# Supplementary material
Source: publisher figshare collection journal article supplement (https://diabetesjournals.figshare.com/articles/dataset/_/12753662)

**Supplemental figures and tables:**

**Supplemental Table 1: Demographic Characteristics at first OGTT for progressors and non-progressors:**

| Selected characteristics by progression status         |              |             |                 |                 |
|--------------------------------------------------------|--------------|-------------|-----------------|-----------------|
|                                                        | All          | Progressors | Non-progressors |                 |
|                                                        | N=2514       | N=298       | N=2216          | <i>p</i> -value |
| <b>Age (yrs)*</b>                                      | 12.5 (15.4)  | 10.5 ( 8.1) | 12.7 (17.4)     | <0.001          |
| <b>Interval (1<sup>st</sup> to last OGTT) - (yrs)*</b> | 2.1 ( 3.1)   | 1.7 ( 2.2)  | 2.1 ( 3.4)      | <0.001          |
| <b>BMI z-score*</b>                                    | 0.6 ( 1.7)   | 0.6 ( 1.6)  | 0.6 ( 1.7)      | 0.464           |
| <b>Male (%)</b>                                        | 1236 (49.3%) | 158 (53.4%) | 1078 (48.8%)    | 0.138           |
| <b>White (%)</b>                                       | 2155 (85.7%) | 262 (87.9%) | 1893 (85.4%)    | 0.290           |
| *median (IQR), Wilcoxon rank-sum test                  |              |             |                 |                 |

**Supplemental table 2: Logistic regression analyses showing odds ratios (OR) with 95% confidence interval (CI) for changes from one GRC form to another in progressors compared to non-progressors, before and after adjustments for age, sex, BMI z-score at baseline and duration between 1<sup>st</sup> and last OGTT**

[illegible]

**Supplemental table 3: Metabolic changes among Monophasic progressors from last to diagnostic OGTTs.**

| Change in metabolic measurements from last non-diabetic OGTT to diagnostic OGTT |    |               |                 |                 |
|---------------------------------------------------------------------------------|----|---------------|-----------------|-----------------|
|                                                                                 |    | Last OGTT     | Diagnostic OGTT | Sign Rank       |
|                                                                                 | N  | Median (IQR)  | Median (IQR)    | <i>p</i> -value |
|                                                                                 |    |               |                 |                 |
| <b>Early C-peptide</b>                                                          |    |               |                 |                 |
| Monophasic to Monotonic                                                         | 64 | 1.91( 0.97)   | 0.99( 0.72)     | <0.001          |
| Monophasic to Monophasic                                                        | 61 | 2.67( 1.42)   | 1.92( 1.28)     | <0.001          |
| <b>C-peptide Index</b>                                                          |    |               |                 |                 |
| Monophasic to Monotonic                                                         | 64 | 0.03( 0.02)   | 0.01( 0.01)     | <0.001          |
| Monophasic to Monophasic                                                        | 61 | 0.031( 0.025) | 0.021( 0.018)   | <0.001          |
| <b>Index 60</b>                                                                 |    |               |                 |                 |
| Monophasic to Monotonic                                                         | 64 | 1.77( 1.02)   | 3.12( 1.43)     | <0.001          |
| Monophasic to Monophasic                                                        | 61 | 1.25( 1.34)   | 2.30( 1.39)     | <0.001          |
| <b>C-peptide AUC/glucose AUC</b>                                                |    |               |                 |                 |
| Monophasic to Monotonic                                                         | 64 | 0.02( 0.01)   | 0.01( 0.01)     | <0.001          |
| Monophasic to Monophasic                                                        | 61 | 0.032( 0.020) | 0.022( 0.013)   | <0.001          |
| <b>HOMA IR</b>                                                                  |    |               |                 |                 |
| Monophasic to Monotonic                                                         | 60 | 1.20( 0.91)   | 1.61( 1.16)     | <0.001          |
| Monophasic to Monophasic                                                        | 58 | 1.88( 1.77)   | 2.30( 2.69)     | <0.001          |

**Supplemental table 4: Comparison of demographic and metabolic characteristics between ‘Others’ and those with a defined GRC shape at first OGTT.**

|                          |               | OGTT Curve Shape                    |               |                 |
|--------------------------|---------------|-------------------------------------|---------------|-----------------|
|                          | All           | Biphasic, Monophasic<br>or Monotone | Other         |                 |
|                          | N=2835        | N=2514                              | N=321         | <i>p</i> -value |
| Age (yrs)*               | 12.4 (13.6)   | 12.5 (15.4)                         | 12.2 (10.1)   | 0.1364          |
| Male (%)                 | 1385 (49.0%)  | 1236 (49.3%)                        | 149 (46.6%)   | 0.3733          |
| White (%)                | 2431 (85.7%)  | 2155 (85.7%)                        | 276 (86.0%)   | 1.0000          |
| BMI z-score*             | 0.6 ( 1.7)    | 0.6 ( 1.7)                          | 0.5 ( 1.7)    | 0.1926          |
| Early C-peptide (30-0) * | 3.5 ( 2.7)    | 3.5 ( 2.8)                          | 3.6 ( 2.6)    | 0.5053          |
| C-peptide index*         | 0.1 ( 0.1)    | 0.1 ( 0.1)                          | 0.1 ( 0.1)    | 0.2072          |
| C-peptide AUC/gluc AUC   | 0.042 (0.026) | 0.042 (0.026)                       | 0.042 (0.027) | 0.9562          |
| Index 60*                | -0.004 ( 1.5) | -0.002 ( 1.5)                       | -0.014 ( 1.4) | 0.2895          |
| HOMA IR*                 | 1.4 ( 1.4)    | 1.4 ( 1.4)                          | 1.4 ( 1.4)    | 0.4759          |
| *median (IQR)            |               |                                     |               |                 |

Supplemental figure 1.

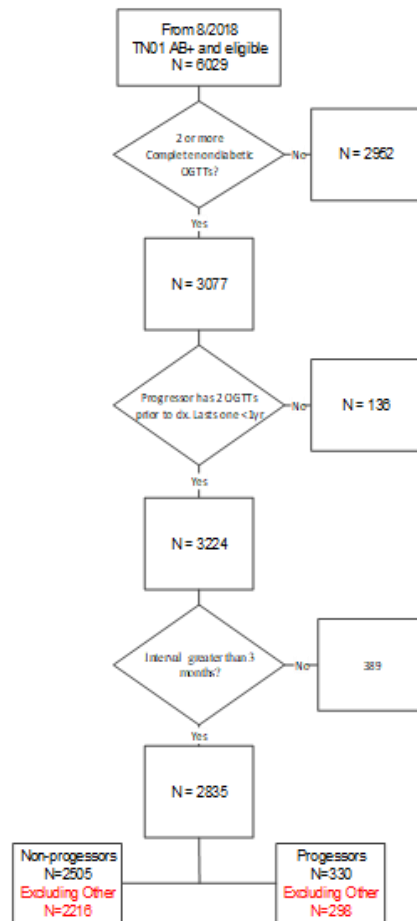

Supplement: Supplementary file 1 [file 3]
